# Supplementary material
Source: bioRxiv or medRxiv preprint supplement (https://medrxiv.org/highwire/filestream/72585/field_highwire_adjunct_files/0/2020.02.22.20025320-1.pdf)
Supplement: Supplementary file [file 2020.02.22.20025320-1.pdf]

## **Ethics approval and consent to participate**

2019 novel coronavirus disease (COVID-19) outbreaked in Wuhan, China, in December 2019. It was declared by WHO as a global public health emergency. Among the different disease types, cancer patients are often recalled to the hospital for treatment and disease surveillance, and the majority of cancer treatments such as chemotherapy and radiotherapy are immunosuppressive. Therefore, it is urgent for us to retrospectively investigate if cancer patients were at an elevated risk of SARS-CoV-2 infection.

This retrospective study was approved by the Ethics Committee of Zhongnan hospital of Wuhan University. Ethics Committee approved oral informed consent, as the data were reviewed and analyzed anonymously. Informed consent was obtained orally from the included patients by telephone.

Finally, we believe that timely dissemination of this data will help formulate preventive measures e.g. reduction of hospital visits and isolation protocols for cancer patients in other parts of the world that are also affected by this virus epidemic.
